# Supplementary material for: Enisamium Reduces Influenza Virus Shedding and Improves Patient Recovery by Inhibiting Viral RNA Polymerase Activity
Source: PubMed Central journal article supplement (PMC8097484; doi:10.1128/aac.02605-20), 2021-03-18
Supplement: AAC.02605-20-s0002.pdf [file AAC.02605-20-s0002.pdf]

Supplemental information for:

**Enisamium reduces influenza virus shedding and improves patient recovery by inhibiting viral RNA polymerase activity**

Aartjan J.W. te Velthuis<sup>2,9,#,\$</sup>, Tatiana G. Zubkova<sup>1,9</sup>, Megan Shaw<sup>3\*</sup>, Andrew Mehle<sup>4</sup>, David Boltz<sup>5</sup>, Norbert Gmeinwieser<sup>6</sup>, Holger Stammer<sup>6</sup>, Jens Milde<sup>6</sup>, Lutz Müller<sup>7#</sup>, Victor Margitich<sup>8</sup>

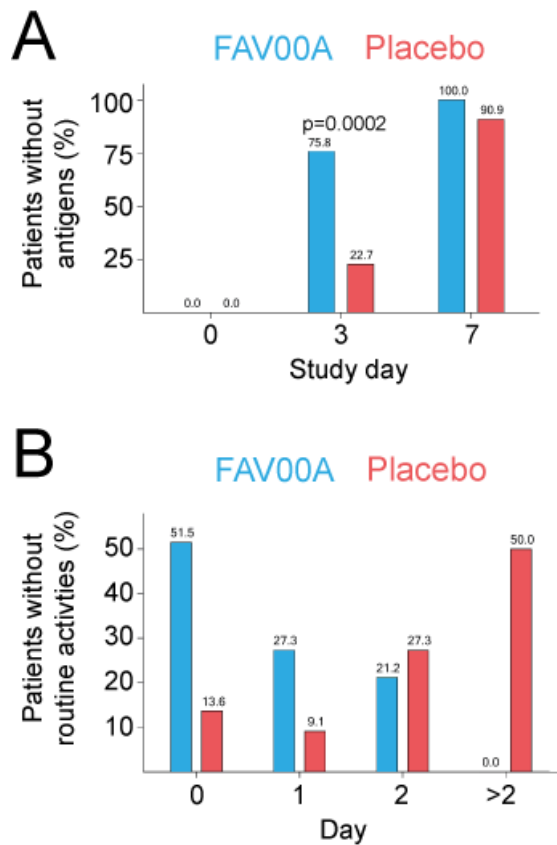

**Figure S1. Enisamium treatment reduces viral antigen levels and improves patient activity the subgroup of patients with influenza infection.** A) Patients in whom influenza virus antigens were not detected by immunofluorescence staining of nasal swabs (%). B) Patients without routine activities (%). P values were determined by Fisher's exact test.

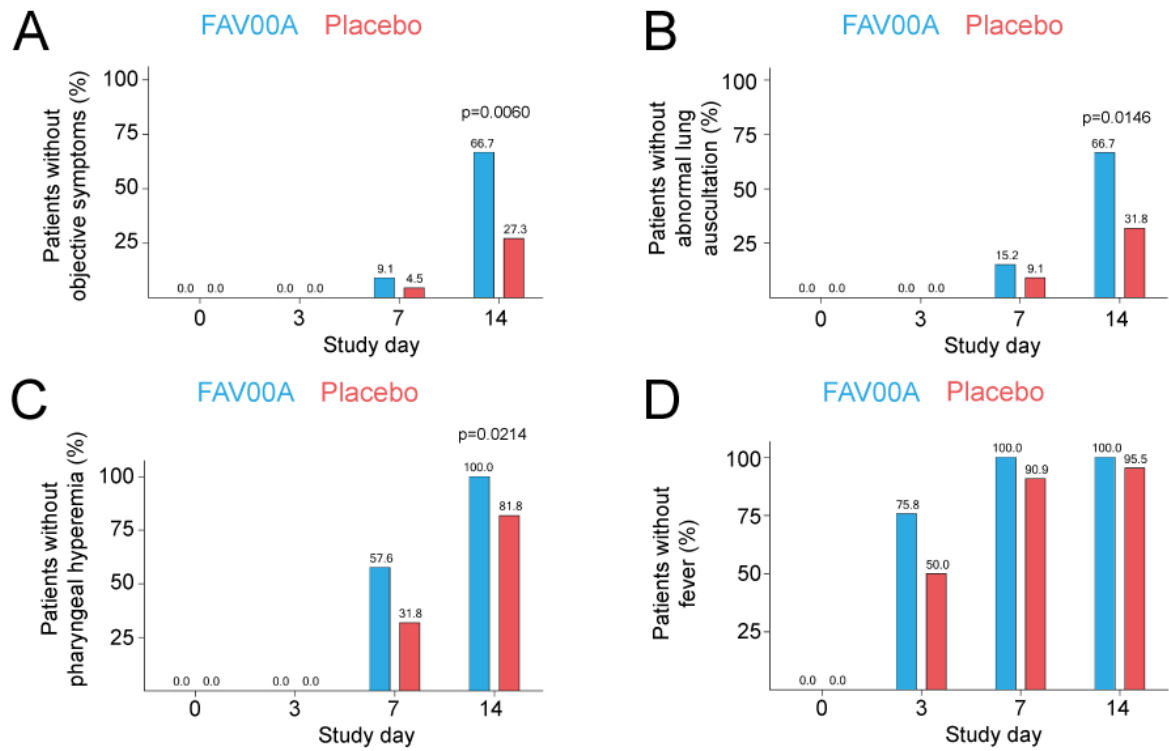

**Figure S2. Enisamium treatment reduces objective symptoms in the subgroup of patients with influenza.** A) Patients without objective symptoms at different visit days (%). B) Patients without abnormal breath sounds at different visit days (%). C) Patients without pharyngeal hyperemia at different visit days (%). D) Patients without fever at different visit days (%). P values were determined by Fisher's exact test.

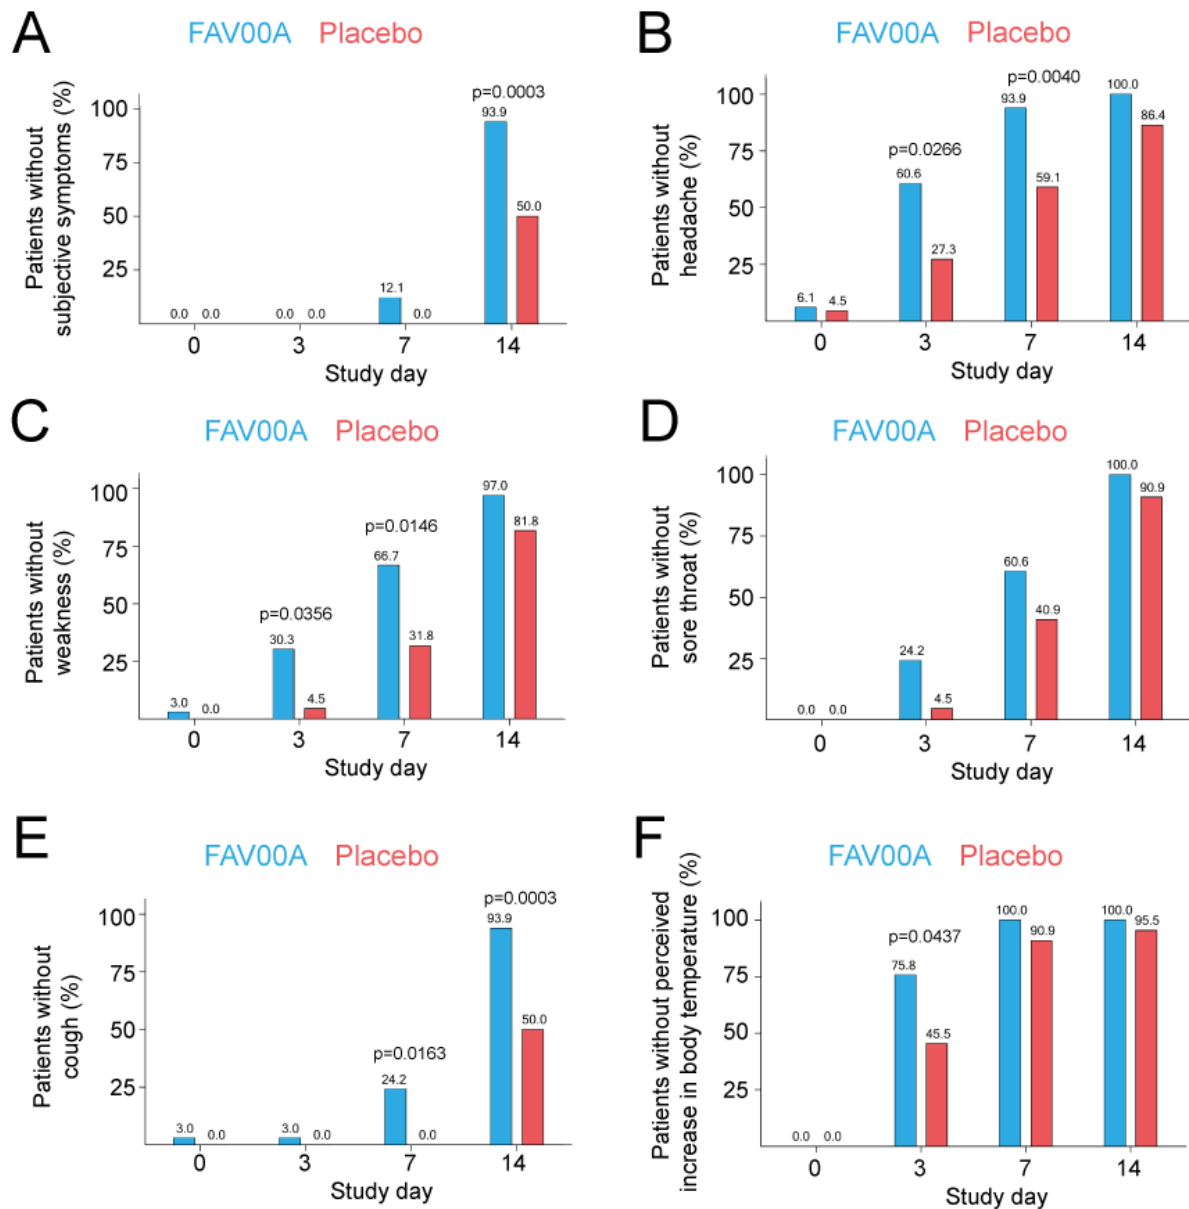

**Figure S3. Enisamium treatment reduces subjective symptoms in the subgroup of patients with influenza infection.** A) Patients without subjective symptoms at different visit days (%). B) Patients without headache at different visit days (%). C) Patients without weakness at different visit days (%). D) Patients without sore throat at different visit days (%). E) Patients without cough at different visit days (%). F) Patients without elevated body temperature at different visit days (%). P values were determined by Fisher's exact test.

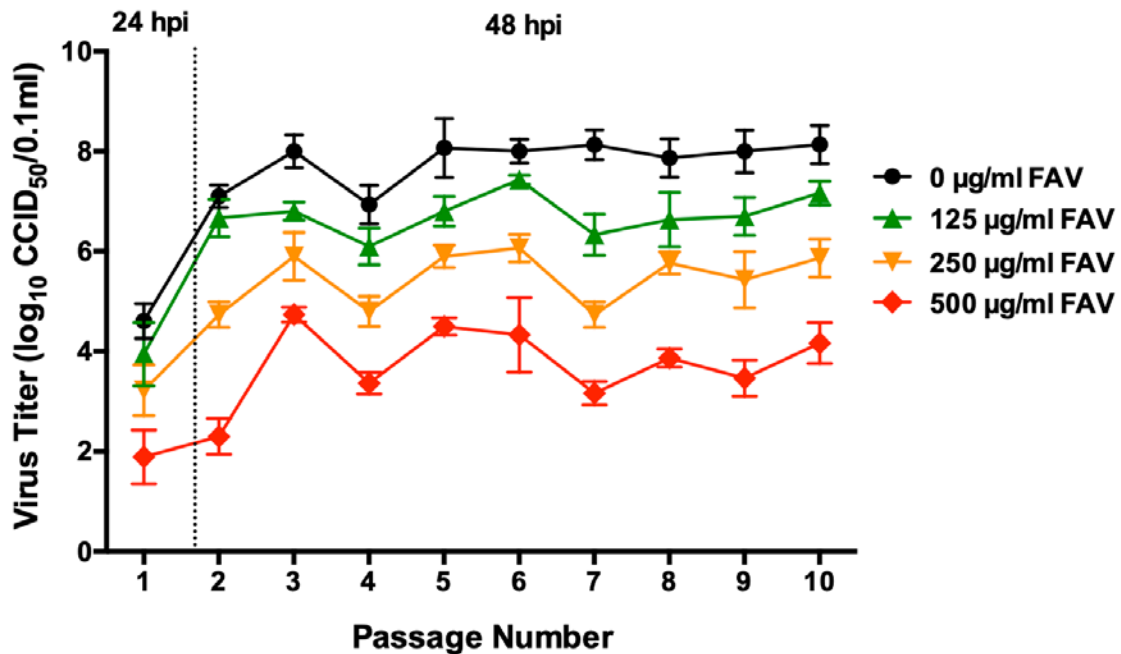

**Figure S4. Effect of FAV00B on influenza A/Brisbane/59/2007 (H1N1) virus replication in NHBE cells after 1 to 10 passages of virus in cells treated with enisamium.** NHBE cells were infected and treated with enisamium at four concentrations (0, 125, 250, and 500 µg/ml). Twenty-four hours post infection (hpi, Passage 1) and 48 hpi (Passages 2-10), respectively, supernatants were harvested and the resulting virus titers were determined on MDCK cells. Virus was grown under low drug pressure (125 µg/ml in passages 1 and 2) and moderate drug pressure (250 µg/ml in passages 3-10) using virus grown in the preceding passage in NHBE cells. At 0 µg/ml, the virus was serially passaged in the absence of enisamium using the preceding virus passage. Statistical comparisons within each column, comparing rows (simple effect within columns) by two-way ANOVA indicated no statistically significant differences between virus titers at passage 3 compared to passage 10 for each of the lines that was analyzed. Each line (representing infected cells treated with a different concentration of enisamium) was significantly different from all the other lines ( $P < 0.0001$ ).
